# Supplementary material for: A remarkable energy barrier for spin reversal in a field induced dinuclear ytterbium single molecule magnet
Source: Royal Society of Chemistry journal article supplement (doi:10.1039/d1dt02130c), 2021-01-01
Supplement: d1dt02130c1.pdf [file d1dt02130c1.pdf]

## Supporting Information

### Remarkable energy barrier for spin reversal in field induced dinuclear ytterbium single molecule magnet

Arpan Mondal and Sanjit Konar\*

Department of Chemistry, Indian Institute of Science Education and Research (IISER), Bhopal By-pass Road, Bhauri, Bhopal-462066, India

#### Experimental Section:

As received analytical grade chemicals and reagents were used from commercial sources without further purification. All the reactions were carried under aerobic conditions. The metal salts [Yb(NO)<sub>3</sub>], picolinaldehyde, 2-hydroxy-5-methylbenzaldehyde, and triethylamine were purchased from Sigma Aldrich Chemical Co. The Powder X-ray diffraction (PXRD) data for the compound was collected on a PANalytical EMPYREAN instrument using Cu-K $\alpha$  radiation. The Elementar Microvario Cube Elemental Analyzer was used for elemental analyses. IR spectrum was recorded on KBr pellets by Perkin-Elmer spectrometer. The <sup>1</sup>HNMR spectrum was collected in Bruker's AVANCE-III 500MHz NMR spectrometers. The magnetic susceptibility measurements were carried out with a Quantum Design SQUID-VSM magnetometer for both the samples. The sample holder correction was done for the experimentally measured values and the diamagnetic correction was estimated by Pascal's constants<sup>1</sup> for the studied compound.

#### Crystal Data Collection and Structure Determination:

A Brüker APEX-II CCD diffractometer with a graphite monochromated Mo-K $\alpha$  radiation ( $\alpha = 0.71073 \text{ \AA}$ ) was used to collect the X-ray data for complex **1**. the data collection was performed with the  $\phi$  and  $\omega$  scan and solved using direct methods followed by full-matrix least square refinements against F<sup>2</sup> (all data HKLF 4 format) using SHELXTL.<sup>2</sup> The structure was solved in the Olex2<sup>3</sup> software interface using intrinsic phasing in ShelXT structure solution programme. The positions of the non-hydrogen atoms were confirmed by the subsequent difference Fourier synthesis and least-square refinement. All the non-hydrogen atoms were refined anisotropically and hydrogen atoms were placed geometrically and refined using the riding model. The crystallographic details for complexes **1** have been summarized in Table S1 and CCDC 2044800 contain the crystal data for this paper. These data can be obtained free of charge from the Cambridge Crystallographic Data Centre via [www.ccdc.cam.ac.uk/data\\_requested/cif](http://www.ccdc.cam.ac.uk/data_requested/cif).

#### Computational Details:

All the calculations were performed on the coordinates obtained from the single crystal structure without optimization using MOLCAS 8.2 software package.<sup>4</sup> On the other hand, for model complex **1a**, we fixed the water molecules in the axial position at an average distance 2.30 Å according to the other reported Yb complexes. Then the hydrogen optimization was performed with the corresponding Gd-complex and the optimized coordinates were used for further calculations. The ab initio calculations were performed on trivalent Yb centre and the single ion anisotropy was calculated by replacing the paramagnetic lanthanide ion with diamagnetic Lu<sup>+3</sup> ion. We employed the basis set from ANO-RCC library for all the calculations e.g ANO-

RCC...9s8p6d4f3g2h. for Yb and Lu, ANO-RCC...3s2p1d for O and N, ANO-RCC...3s2p., for C and ANO-RCC...2s. for H. In addition, the Douglas-Kroll-Hess Hamiltonian<sup>5</sup> has been used to include the relativistic effect. To obtain the energy of the spin-free eigen states we have performed the complete active space self-consistence field (CASSCF) method<sup>6</sup> by including 13 electrons in 7 4f orbitals for Yb<sup>III</sup> ion. In this active space 7 doublets excited states have been consider in the configuration interaction procedure to compute the magnetic anisotropy of the single metal centers. Also we used RASSI-SO<sup>7</sup> to introduce the spin-orbit coupling within the space of the calculated spin-free eigen states for both compounds. Further to compute the g tensor and the crystal field parameters we have used the Single\_Aniso module<sup>8</sup> as implemented in MOLCAS by considering previously calculated spin-orbit sates. In addition, the Cholesky decomposition for 2-eletron integrals was used throughout the calculations to save the disk space.

**Synthesis of Picolinohydrazide:** The picolinohydrazide was synthesized by the simple condensation reaction between picolinaldehyde (5 mmol, 0.475 ml) and excess hydrazine hydrate (50 mmol, 2.5 ml) in MeOH solvent (25 ml) at 80 °C for 24 h. A white color microcrystalline precipitate was obtained (Yield 80%) and wash with cold methanol and used further without purification.

#### **<sup>1</sup>H NMR for Picolinohydrazide**

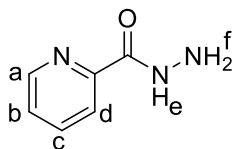

<sup>1</sup>H NMR (500 MHz, DMSO-d<sub>6</sub>): δ<sub>H</sub> 9.896 (s, H<sub>e</sub>), 8.599 (d, H<sub>a</sub>), 7.93-8.00 (m, H<sub>b</sub>, H<sub>c</sub>), 7.547 (t, H<sub>d</sub>), 4.6128 (s, 2H<sub>f</sub>).

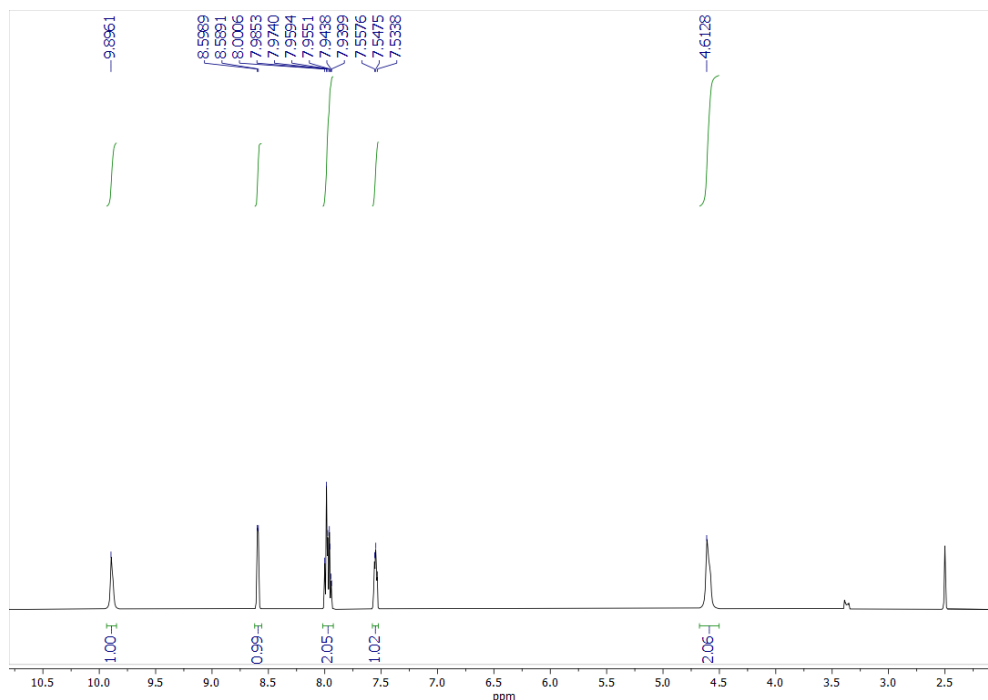

### Synthesis of $[\text{Yb}_2(5\text{-Me-L})_2(\text{DMF})_2(\text{NO}_3)_2]\cdot\text{DMF}$ :

In 25 ml round bottom flask, a solution of picolinohydrazide (0.2 mmol, 28 mg) and 2-hydroxy-5-methylbenzaldehyde (0.2 mmol, 26 mg) in 6 ml mixed solvent (3 ml MeOH and 3 ml DMF) was stirred for 10 min in presence of few drops of (2-3 drops) glacial acetic acid. Then  $\text{Yb}(\text{NO}_3)_3\cdot 6\text{H}_2\text{O}$  (0.2 mmol, 92 mg) and  $\text{Et}_3\text{N}$  (0.2 mmol) were added and refluxed the reaction mixture for 2 h. An intense yellow color solution and precipitate was obtained and cooled to room temperature. After filtration, the precipitate was dissolved in hot DMF and kept for crystallization by vapor diffusion with DEE at room temperature. The yellow color block shaped crystals suitable for X-ray crystallography are obtained after 2 days. (Yield 60%). Elem anal. Calcd for  $\text{C}_{37}\text{H}_{42}\text{N}_{11}\text{O}_{13}\text{Yb}_2$ : C, 37.19; H, 3.54; N, 12.89%. Found: C, 37.15; H, 3.49; N, 12.35%. IR (KBr pellet,  $4000 - 400\text{ cm}^{-1}$ )  $\nu/\text{cm}^{-1}$ : 3259, 2989, 2893, 2849, 2793, 1620, 1569, 1523, 1477, 1449, 1393, 1165, 1093, 810, 745.

**Table S1.** Crystal data and structure refinement for Complex 1.

| Identification code | <b>Complex 1</b>                                                  |
|---------------------|-------------------------------------------------------------------|
| Empirical formula   | $\text{C}_{37}\text{H}_{42}\text{N}_{11}\text{O}_{13}\text{Yb}_2$ |
| Formula weight      | 1194.89                                                           |
| Temperature/K       | 140                                                               |
| Crystal system      | triclinic                                                         |
| Space group         | P-1                                                               |
| a/Å                 | 10.3127(6)                                                        |
| b/Å                 | 10.4419(7)                                                        |
| c/Å                 | 20.5492(13)                                                       |
| $\alpha/^\circ$     | 78.734(3)                                                         |
| $\beta/^\circ$      | 80.248(3)                                                         |

|                                               |                                                               |
|-----------------------------------------------|---------------------------------------------------------------|
| $\gamma/^\circ$                               | 83.810(3)                                                     |
| Volume/ $\text{\AA}^3$                        | 2132.4(2)                                                     |
| Z                                             | 2                                                             |
| $\rho_{\text{calc}}/\text{g/cm}^3$            | 1.861                                                         |
| $\mu/\text{mm}^{-1}$                          | 4.435                                                         |
| F(000)                                        | 1170.0                                                        |
| Crystal size/ $\text{mm}^3$                   | $0.73 \times 0.57 \times 0.49$                                |
| Radiation                                     | MoK $\alpha$ ( $\lambda = 0.71073$ )                          |
| $2\Theta$ range for data collection/ $^\circ$ | 2.044 to 51.72                                                |
| Index ranges                                  | $-11 \leq h \leq 12, -12 \leq k \leq 11, -25 \leq l \leq 25$  |
| Reflections collected                         | 28908                                                         |
| Independent reflections                       | 8124 [ $R_{\text{int}} = 0.0282, R_{\text{sigma}} = 0.0333$ ] |
| Data/restraints/parameters                    | 8124/0/576                                                    |
| Goodness-of-fit on $F^2$                      | 1.124                                                         |
| Final R indexes [ $I \geq 2\sigma(I)$ ]       | $R_1 = 0.0249, wR_2 = 0.0470$                                 |
| Final R indexes [all data]                    | $R_1 = 0.0299, wR_2 = 0.0592$                                 |
| Largest diff. peak/hole / $e \text{\AA}^{-3}$ | 0.81/-1.03                                                    |

**Table S2.** The SHAPE analysis for complexes **1**.

|          |    |          |                                            |
|----------|----|----------|--------------------------------------------|
| OP-8     | 1  | $D_{8h}$ | Octagon                                    |
| HPY-8    | 2  | $C_{7v}$ | Heptagonal pyramid                         |
| HBPY-8   | 3  | $D_{6h}$ | Hexagonal bipyramid                        |
| CU-8     | 4  | $O_h$    | Cube                                       |
| SAPR-8   | 5  | $D_{4d}$ | Square antiprism                           |
| TDD-8    | 6  | $D_{2d}$ | Triangular dodecahedron                    |
| JGBF-8   | 7  | $D_{2d}$ | Johnson gyrobifastigium J26                |
| JETBPY-8 | 8  | $D_{3h}$ | Johnson elongated triangular bipyramid J14 |
| JBTPR-8  | 9  | $C_{2v}$ | Biaugmented trigonal prism J50             |
| BTPR-8   | 10 | $C_{2v}$ | Biaugmented trigonal prism                 |
| JSD-8    | 11 | $D_{2d}$ | Snub diphenoid J84                         |
| TT-8     | 12 | Td       | Triakis tetrahedron                        |
| ETBPY-8  | 13 | $D_{3h}$ | Elongated trigonal bipyramid               |

| Structure<br>ML <sub>8</sub> | OP-8   | HPY-8  | HBPY-8 | CU-8   | SAPR-8 | TDD-8 | JGBF-8 | JETBPY-8 | JBTPR-8 | BTPR-8       | JSD-8 | TT-8   | ETBPY-8 |
|------------------------------|--------|--------|--------|--------|--------|-------|--------|----------|---------|--------------|-------|--------|---------|
| <b>1</b>                     | 31.464 | 20.456 | 17.023 | 14.617 | 5.222  | 3.735 | 13.387 | 24.141   | 3.377   | <b>3.354</b> | 5.052 | 15.019 | 22.528  |

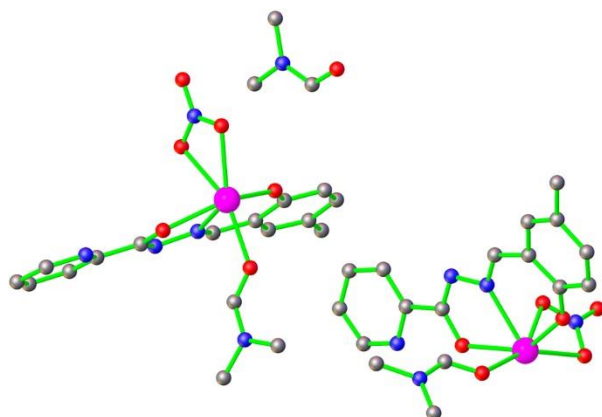

**Fig S1.** The asymmetric unit of complex **1**. Hydrogens are removed for clarity.

**Table S3.** Bond Lengths for Complex **1**.

| Atom       | Atom                   | Length/Å   | Atom       | Atom       | Length/Å  |
|------------|------------------------|------------|------------|------------|-----------|
| <b>Yb2</b> | <b>Yb2<sup>1</sup></b> | 3.8083 (4) | <b>N2</b>  | <b>C12</b> | 1.300 (6) |
| <b>Yb2</b> | <b>O8</b>              | 2.296 (3)  | <b>N11</b> | <b>C35</b> | 1.465 (7) |
| <b>Yb2</b> | <b>O7</b>              | 2.117 (3)  | <b>N11</b> | <b>C34</b> | 1.324 (7) |
| <b>Yb2</b> | <b>O9</b>              | 2.255 (3)  | <b>N11</b> | <b>C36</b> | 1.450 (7) |
| <b>Yb2</b> | <b>O9<sup>1</sup></b>  | 2.283 (3)  | <b>N1</b>  | <b>C8</b>  | 1.285 (6) |
| <b>Yb2</b> | <b>O10</b>             | 2.401 (3)  | <b>N5</b>  | <b>C9</b>  | 1.311 (6) |
| <b>Yb2</b> | <b>O11</b>             | 2.456 (3)  | <b>N5</b>  | <b>C11</b> | 1.457 (6) |
| <b>Yb2</b> | <b>N8<sup>1</sup></b>  | 2.488 (4)  | <b>N5</b>  | <b>C10</b> | 1.441 (7) |
| <b>Yb2</b> | <b>N6</b>              | 2.432 (4)  | <b>C8</b>  | <b>C7</b>  | 1.462 (6) |
| <b>Yb2</b> | <b>N10</b>             | 2.857 (4)  | <b>C30</b> | <b>C29</b> | 1.377 (6) |
| <b>Yb2</b> | <b>C28</b>             | 3.143 (4)  | <b>C30</b> | <b>C31</b> | 1.382 (6) |
| <b>Yb1</b> | <b>Yb1<sup>2</sup></b> | 3.8333 (4) | <b>N3</b>  | <b>C13</b> | 1.348 (6) |
| <b>Yb1</b> | <b>O3<sup>2</sup></b>  | 2.281 (3)  | <b>N3</b>  | <b>C17</b> | 1.355 (6) |
| <b>Yb1</b> | <b>O3</b>              | 2.275 (3)  | <b>C28</b> | <b>C29</b> | 1.485 (6) |
| <b>Yb1</b> | <b>O1</b>              | 2.127 (3)  | <b>N9</b>  | <b>C27</b> | 1.457 (6) |
| <b>Yb1</b> | <b>O2</b>              | 2.293 (3)  | <b>N9</b>  | <b>C25</b> | 1.310 (6) |
| <b>Yb1</b> | <b>N4</b>              | 2.854 (4)  | <b>N9</b>  | <b>C26</b> | 1.458 (6) |
| <b>Yb1</b> | <b>O4</b>              | 2.440 (3)  | <b>O13</b> | <b>C34</b> | 1.218 (6) |
| <b>Yb1</b> | <b>O5</b>              | 2.410 (4)  | <b>C12</b> | <b>C13</b> | 1.470 (6) |
| <b>Yb1</b> | <b>N1</b>              | 2.431 (4)  | <b>C31</b> | <b>C32</b> | 1.378 (7) |
| <b>Yb1</b> | <b>N3<sup>2</sup></b>  | 2.491 (3)  | <b>C1</b>  | <b>C7</b>  | 1.410 (6) |
| <b>Yb1</b> | <b>C12</b>             | 3.151 (4)  | <b>C1</b>  | <b>C2</b>  | 1.389 (7) |
| <b>Yb1</b> | <b>C9</b>              | 3.206 (5)  | <b>C32</b> | <b>C33</b> | 1.385 (6) |
| <b>O8</b>  | <b>C25</b>             | 1.245 (5)  | <b>C24</b> | <b>C23</b> | 1.446 (6) |
| <b>O7</b>  | <b>C18</b>             | 1.327 (5)  | <b>C13</b> | <b>C14</b> | 1.392 (6) |
| <b>O3</b>  | <b>C12</b>             | 1.322 (5)  | <b>C23</b> | <b>C22</b> | 1.411 (6) |
| <b>O9</b>  | <b>C28</b>             | 1.327 (5)  | <b>C23</b> | <b>C18</b> | 1.413 (6) |
| <b>O1</b>  | <b>C1</b>              | 1.330 (5)  | <b>C7</b>  | <b>C6</b>  | 1.402 (6) |
| <b>O2</b>  | <b>C9</b>              | 1.252 (5)  | <b>C6</b>  | <b>C4</b>  | 1.380 (7) |
| <b>O10</b> | <b>N10</b>             | 1.280 (5)  | <b>C14</b> | <b>C15</b> | 1.399 (7) |
| <b>N4</b>  | <b>O4</b>              | 1.272 (5)  | <b>C17</b> | <b>C16</b> | 1.374 (6) |
| <b>N4</b>  | <b>O5</b>              | 1.258 (5)  | <b>C2</b>  | <b>C3</b>  | 1.390 (7) |
| <b>N4</b>  | <b>O6</b>              | 1.219 (5)  | <b>C22</b> | <b>C21</b> | 1.388 (6) |

|            |     |           |  |     |     |           |
|------------|-----|-----------|--|-----|-----|-----------|
| <b>O11</b> | N10 | 1.267 (5) |  | C18 | C19 | 1.402 (6) |
| <b>O12</b> | N10 | 1.220 (5) |  | C21 | C20 | 1.394 (7) |
| <b>N7</b>  | N6  | 1.425 (5) |  | C21 | C37 | 1.509 (6) |
| <b>N7</b>  | C28 | 1.293 (5) |  | C19 | C20 | 1.377 (6) |
| <b>N8</b>  | C29 | 1.357 (6) |  | C15 | C16 | 1.374 (7) |
| <b>N8</b>  | C33 | 1.341 (5) |  | C4  | C5  | 1.514 (7) |
| <b>N6</b>  | C24 | 1.292 (5) |  | C4  | C3  | 1.403 (7) |
| <b>N2</b>  | N1  | 1.418 (5) |  |     |     |           |

**Table S4.** Bond Angles for complex **1**.

| Table 5 Bond Angles for arp1_a. |      |                  |            |  |                 |      |                  |            |
|---------------------------------|------|------------------|------------|--|-----------------|------|------------------|------------|
| Atom                            | Atom | Atom             | Angle/°    |  | Atom            | Atom | Atom             | Angle/°    |
| <b>O8</b>                       | Yb2  | Yb2 <sup>1</sup> | 80.56(8)   |  | N3 <sup>2</sup> | Yb1  | Yb1 <sup>2</sup> | 98.38(8)   |
| <b>O8</b>                       | Yb2  | O10              | 152.99(11) |  | N3 <sup>2</sup> | Yb1  | N4               | 97.50(12)  |
| <b>O8</b>                       | Yb2  | O11              | 153.79(11) |  | N3 <sup>2</sup> | Yb1  | C12              | 151.55(12) |
| <b>O8</b>                       | Yb2  | N8 <sup>1</sup>  | 83.62(11)  |  | N3 <sup>2</sup> | Yb1  | C9               | 101.91(12) |
| <b>O8</b>                       | Yb2  | N6               | 83.31(11)  |  | C12             | Yb1  | Yb1 <sup>2</sup> | 54.04(9)   |
| <b>O8</b>                       | Yb2  | N10              | 176.54(11) |  | C12             | Yb1  | C9               | 66.69(12)  |
| <b>O8</b>                       | Yb2  | C28              | 84.47(11)  |  | C9              | Yb1  | Yb1 <sup>2</sup> | 74.39(9)   |
| <b>O7</b>                       | Yb2  | Yb2 <sup>1</sup> | 170.62(8)  |  | C25             | O8   | Yb2              | 128.7(3)   |
| <b>O7</b>                       | Yb2  | O8               | 91.06(11)  |  | C18             | O7   | Yb2              | 141.1(3)   |
| <b>O7</b>                       | Yb2  | O9               | 141.76(11) |  | Yb1             | O3   | Yb1 <sup>2</sup> | 114.60(12) |
| <b>O7</b>                       | Yb2  | O9 <sup>1</sup>  | 150.42(11) |  | C12             | O3   | Yb1 <sup>2</sup> | 125.3(3)   |
| <b>O7</b>                       | Yb2  | O10              | 94.23(12)  |  | C12             | O3   | Yb1              | 120.0(3)   |
| <b>O7</b>                       | Yb2  | O11              | 91.41(12)  |  | Yb2             | O9   | Yb2 <sup>1</sup> | 114.08(12) |
| <b>O7</b>                       | Yb2  | N8 <sup>1</sup>  | 84.32(12)  |  | C28             | O9   | Yb2              | 120.4(3)   |
| <b>O7</b>                       | Yb2  | N6               | 75.91(11)  |  | C28             | O9   | Yb2 <sup>1</sup> | 125.5(3)   |
| <b>O7</b>                       | Yb2  | N10              | 92.40(11)  |  | C1              | O1   | Yb1              | 140.0(3)   |
| <b>O7</b>                       | Yb2  | C28              | 120.81(11) |  | C9              | O2   | Yb1              | 127.0(3)   |
| <b>O9<sup>1</sup></b>           | Yb2  | Yb2 <sup>1</sup> | 32.73(7)   |  | N10             | O10  | Yb2              | 97.1(2)    |
| <b>O9</b>                       | Yb2  | Yb2 <sup>1</sup> | 33.19(7)   |  | O4              | N4   | Yb1              | 58.3(2)    |
| <b>O9</b>                       | Yb2  | O8               | 82.20(11)  |  | O5              | N4   | Yb1              | 56.9(2)    |
| <b>O9<sup>1</sup></b>           | Yb2  | O8               | 81.98(11)  |  | O5              | N4   | O4               | 115.2(4)   |
| <b>O9</b>                       | Yb2  | O9 <sup>1</sup>  | 65.92(12)  |  | O6              | N4   | Yb1              | 178.1(3)   |
| <b>O9<sup>1</sup></b>           | Yb2  | O10              | 80.40(11)  |  | O6              | N4   | O4               | 122.5(4)   |
| <b>O9</b>                       | Yb2  | O10              | 108.68(11) |  | O6              | N4   | O5               | 122.3(4)   |
| <b>O9</b>                       | Yb2  | O11              | 79.79(11)  |  | N10             | O11  | Yb2              | 94.9(3)    |
| <b>O9<sup>1</sup></b>           | Yb2  | O11              | 107.43(11) |  | C28             | N7   | N6               | 110.1(4)   |
| <b>O9</b>                       | Yb2  | N8 <sup>1</sup>  | 131.61(11) |  | N4              | O4   | Yb1              | 95.3(3)    |
| <b>O9<sup>1</sup></b>           | Yb2  | N8 <sup>1</sup>  | 66.40(11)  |  | C29             | N8   | Yb2 <sup>1</sup> | 117.3(3)   |
| <b>O9<sup>1</sup></b>           | Yb2  | N6               | 131.05(11) |  | C33             | N8   | Yb2 <sup>1</sup> | 125.8(3)   |
| <b>O9</b>                       | Yb2  | N6               | 65.95(11)  |  | C33             | N8   | C29              | 116.6(4)   |
| <b>O9<sup>1</sup></b>           | Yb2  | N10              | 94.93(11)  |  | N7              | N6   | Yb2              | 117.5(2)   |
| <b>O9</b>                       | Yb2  | N10              | 95.13(11)  |  | C24             | N6   | Yb2              | 130.0(3)   |
| <b>O9</b>                       | Yb2  | C28              | 21.34(11)  |  | C24             | N6   | N7               | 112.1(4)   |
| <b>O9<sup>1</sup></b>           | Yb2  | C28              | 87.26(11)  |  | C12             | N2   | N1               | 110.3(4)   |
| <b>O10</b>                      | Yb2  | Yb2 <sup>1</sup> | 95.15(9)   |  | N4              | O5   | Yb1              | 97.2(3)    |
| <b>O10</b>                      | Yb2  | O11              | 52.60(11)  |  | O10             | N10  | Yb2              | 56.5(2)    |
| <b>O10</b>                      | Yb2  | N8 <sup>1</sup>  | 70.62(11)  |  | O11             | N10  | Yb2              | 58.9(2)    |
| <b>O10</b>                      | Yb2  | N6               | 123.66(11) |  | O11             | N10  | O10              | 115.3(4)   |
| <b>O10</b>                      | Yb2  | N10              | 26.40(11)  |  | O12             | N10  | Yb2              | 176.6(3)   |
| <b>O10</b>                      | Yb2  | C28              | 114.83(11) |  | O12             | N10  | O10              | 122.3(4)   |

|                 |     |                  |            |  |     |     |                  |           |
|-----------------|-----|------------------|------------|--|-----|-----|------------------|-----------|
| O11             | Yb2 | Yb2 <sup>1</sup> | 94.28(8)   |  | O12 | N10 | O11              | 122.3(4)  |
| O11             | Yb2 | N8 <sup>1</sup>  | 122.58(12) |  | C34 | N11 | C35              | 122.6(4)  |
| O11             | Yb2 | N10              | 26.21(11)  |  | C34 | N11 | C36              | 121.7(5)  |
| O11             | Yb2 | C28              | 71.93(11)  |  | C36 | N11 | C35              | 115.6(5)  |
| N8 <sup>1</sup> | Yb2 | Yb2 <sup>1</sup> | 98.81(8)   |  | N2  | N1  | Yb1              | 117.7(3)  |
| N8 <sup>1</sup> | Yb2 | N10              | 96.60(12)  |  | C8  | N1  | Yb1              | 129.7(3)  |
| N8 <sup>1</sup> | Yb2 | C28              | 152.33(11) |  | C8  | N1  | N2               | 112.5(4)  |
| N6              | Yb2 | Yb2 <sup>1</sup> | 98.77(8)   |  | C9  | N5  | C11              | 121.1(4)  |
| N6              | Yb2 | O11              | 72.04(11)  |  | C9  | N5  | C10              | 121.3(5)  |
| N6              | Yb2 | N8 <sup>1</sup>  | 156.02(11) |  | C10 | N5  | C11              | 117.6(4)  |
| N6              | Yb2 | N10              | 97.65(12)  |  | N1  | C8  | C7               | 125.6(4)  |
| N6              | Yb2 | C28              | 44.92(11)  |  | C29 | C30 | C31              | 118.6(4)  |
| N10             | Yb2 | Yb2 <sup>1</sup> | 96.00(7)   |  | C13 | N3  | Yb1 <sup>2</sup> | 117.6(3)  |
| N10             | Yb2 | C28              | 93.85(11)  |  | C13 | N3  | C17              | 117.5(4)  |
| C28             | Yb2 | Yb2 <sup>1</sup> | 54.53(8)   |  | C17 | N3  | Yb1 <sup>2</sup> | 124.8(3)  |
| O3 <sup>2</sup> | Yb1 | Yb1 <sup>2</sup> | 32.65(7)   |  | O9  | C28 | Yb2              | 38.21(18) |
| O3              | Yb1 | Yb1 <sup>2</sup> | 32.75(8)   |  | O9  | C28 | C29              | 115.2(4)  |
| O3              | Yb1 | O3 <sup>2</sup>  | 65.40(12)  |  | N7  | C28 | Yb2              | 87.1(3)   |
| O3 <sup>2</sup> | Yb1 | O2               | 83.64(12)  |  | N7  | C28 | O9               | 125.0(4)  |
| O3              | Yb1 | O2               | 82.07(11)  |  | N7  | C28 | C29              | 119.8(4)  |
| O3              | Yb1 | N4               | 95.13(11)  |  | C29 | C28 | Yb2              | 152.6(3)  |
| O3 <sup>2</sup> | Yb1 | N4               | 95.19(12)  |  | C27 | N9  | C26              | 117.1(4)  |
| O3 <sup>2</sup> | Yb1 | O4               | 83.43(12)  |  | C25 | N9  | C27              | 121.5(4)  |
| O3              | Yb1 | O4               | 111.15(12) |  | C25 | N9  | C26              | 121.5(4)  |
| O3              | Yb1 | O5               | 78.12(12)  |  | N8  | C29 | C30              | 123.2(4)  |
| O3 <sup>2</sup> | Yb1 | O5               | 105.22(13) |  | N8  | C29 | C28              | 114.7(4)  |
| O3              | Yb1 | N1               | 65.62(12)  |  | C30 | C29 | C28              | 122.1(4)  |
| O3 <sup>2</sup> | Yb1 | N1               | 130.12(11) |  | O3  | C12 | Yb1              | 38.7(2)   |
| O3 <sup>2</sup> | Yb1 | N3 <sup>2</sup>  | 66.10(11)  |  | O3  | C12 | C13              | 115.9(4)  |
| O3              | Yb1 | N3 <sup>2</sup>  | 130.69(11) |  | N2  | C12 | Yb1              | 86.5(3)   |
| O3 <sup>2</sup> | Yb1 | C12              | 86.69(12)  |  | N2  | C12 | O3               | 124.5(4)  |
| O3              | Yb1 | C12              | 21.30(12)  |  | N2  | C12 | C13              | 119.6(4)  |
| O3 <sup>2</sup> | Yb1 | C9               | 86.51(12)  |  | C13 | C12 | Yb1              | 153.3(3)  |
| O3              | Yb1 | C9               | 66.89(12)  |  | C32 | C31 | C30              | 119.7(5)  |
| O1              | Yb1 | Yb1 <sup>2</sup> | 169.13(8)  |  | O1  | C1  | C7               | 122.8(4)  |
| O1              | Yb1 | O3 <sup>2</sup>  | 150.55(11) |  | O1  | C1  | C2               | 119.4(4)  |
| O1              | Yb1 | O3               | 141.44(11) |  | C2  | C1  | C7               | 117.7(4)  |
| O1              | Yb1 | O2               | 88.57(12)  |  | C31 | C32 | C33              | 118.0(4)  |
| O1              | Yb1 | N4               | 93.67(12)  |  | N6  | C24 | C23              | 125.2(4)  |
| O1              | Yb1 | O4               | 92.46(12)  |  | N3  | C13 | C12              | 114.5(4)  |
| O1              | Yb1 | O5               | 94.84(13)  |  | N3  | C13 | C14              | 123.0(4)  |
| O1              | Yb1 | N1               | 76.01(12)  |  | C14 | C13 | C12              | 122.5(4)  |
| O1              | Yb1 | N3 <sup>2</sup>  | 84.93(12)  |  | C22 | C23 | C24              | 117.0(4)  |
| O1              | Yb1 | C12              | 120.86(12) |  | C22 | C23 | C18              | 119.4(4)  |
| O1              | Yb1 | C9               | 94.82(12)  |  | C18 | C23 | C24              | 123.7(4)  |
| O2              | Yb1 | Yb1 <sup>2</sup> | 81.50(8)   |  | C1  | C7  | C8               | 123.6(4)  |
| O2              | Yb1 | N4               | 177.20(11) |  | C6  | C7  | C8               | 116.2(4)  |
| O2              | Yb1 | O4               | 155.33(11) |  | C6  | C7  | C1               | 120.1(4)  |
| O2              | Yb1 | O5               | 152.18(11) |  | C4  | C6  | C7               | 122.0(4)  |
| O2              | Yb1 | N1               | 80.99(12)  |  | N8  | C33 | C32              | 124.0(4)  |
| O2              | Yb1 | N3 <sup>2</sup>  | 84.36(11)  |  | O2  | C9  | Yb1              | 34.9(2)   |
| O2              | Yb1 | C12              | 84.52(11)  |  | O2  | C9  | N5               | 124.6(5)  |
| O2              | Yb1 | C9               | 18.19(11)  |  | N5  | C9  | Yb1              | 158.9(4)  |

|    |     |                  |            |  |     |     |     |          |
|----|-----|------------------|------------|--|-----|-----|-----|----------|
| N4 | Yb1 | Yb1 <sup>2</sup> | 96.14(8)   |  | C13 | C14 | C15 | 117.9(4) |
| N4 | Yb1 | C12              | 92.88(11)  |  | N3  | C17 | C16 | 122.8(5) |
| N4 | Yb1 | C9               | 159.41(12) |  | C1  | C2  | C3  | 121.4(5) |
| O4 | Yb1 | Yb1 <sup>2</sup> | 98.40(9)   |  | C21 | C22 | C23 | 122.5(4) |
| O4 | Yb1 | N4               | 26.33(11)  |  | O8  | C25 | N9  | 125.8(4) |
| O4 | Yb1 | N3 <sup>2</sup>  | 71.20(12)  |  | O7  | C18 | C23 | 123.4(4) |
| O4 | Yb1 | C12              | 115.55(12) |  | O7  | C18 | C19 | 119.5(4) |
| O4 | Yb1 | C9               | 169.50(13) |  | C19 | C18 | C23 | 117.1(4) |
| O5 | Yb1 | Yb1 <sup>2</sup> | 91.96(10)  |  | C22 | C21 | C20 | 117.3(4) |
| O5 | Yb1 | N4               | 25.93(11)  |  | C22 | C21 | C37 | 121.4(4) |
| O5 | Yb1 | O4               | 52.25(12)  |  | C20 | C21 | C37 | 121.2(4) |
| O5 | Yb1 | N1               | 73.14(12)  |  | C20 | C19 | C18 | 122.5(4) |
| O5 | Yb1 | N3 <sup>2</sup>  | 123.42(12) |  | C16 | C15 | C14 | 119.3(4) |
| O5 | Yb1 | C12              | 70.03(11)  |  | C6  | C4  | C5  | 121.9(4) |
| O5 | Yb1 | C9               | 134.27(12) |  | C6  | C4  | C3  | 117.5(5) |
| N1 | Yb1 | Yb1 <sup>2</sup> | 97.96(9)   |  | C3  | C4  | C5  | 120.6(5) |
| N1 | Yb1 | N4               | 97.91(12)  |  | C2  | C3  | C4  | 121.2(5) |
| N1 | Yb1 | O4               | 123.14(12) |  | C19 | C20 | C21 | 121.1(4) |
| N1 | Yb1 | N3 <sup>2</sup>  | 156.14(12) |  | C15 | C16 | C17 | 119.5(5) |
| N1 | Yb1 | C12              | 44.88(13)  |  | O13 | C34 | N11 | 125.8(5) |
| N1 | Yb1 | C9               | 66.18(12)  |  |     |     |     |          |

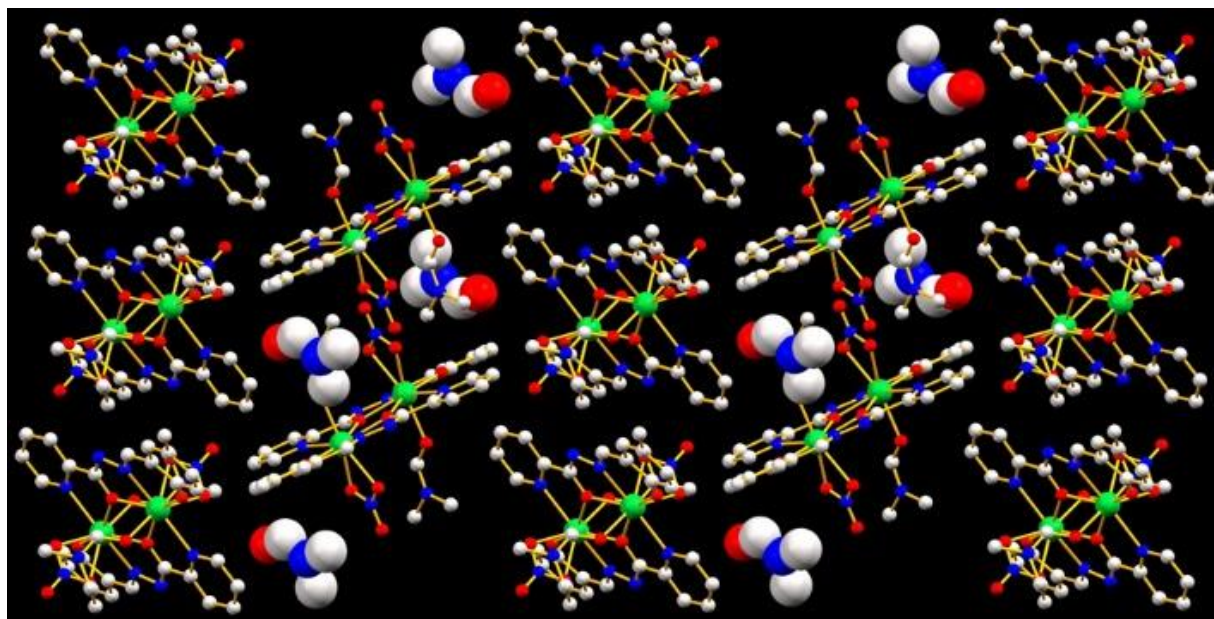

**Fig S2.** Presence of solvent molecules and 2D supramolecular arrangement of complex **1** along crystallographic *b* axis.



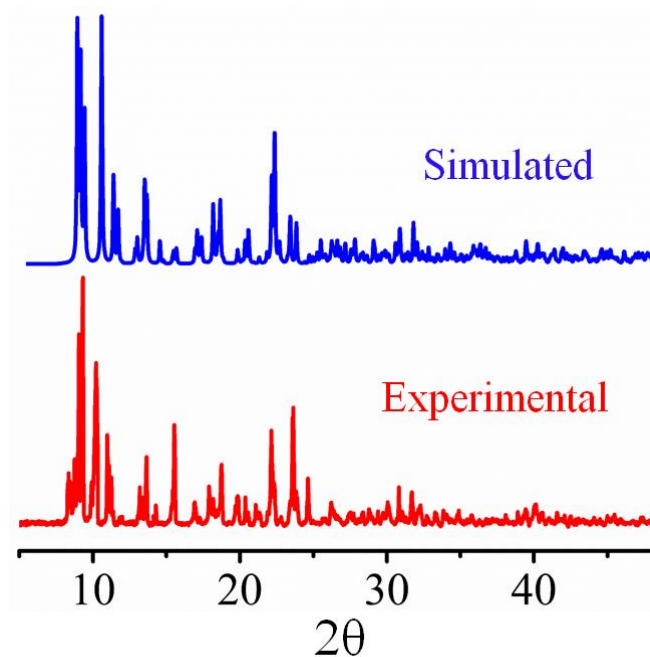

**Fig S3.** Simulated patterns for single crystal and Powder-XRD for bulk sample of complex **1**.

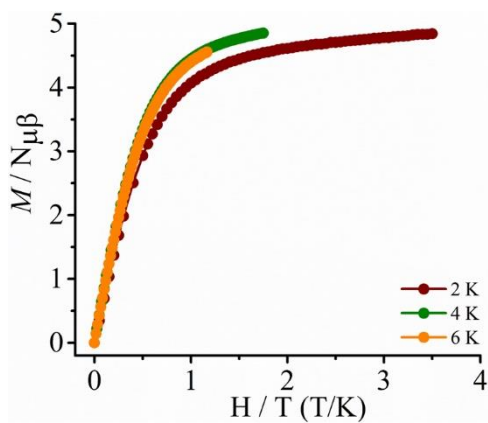

**Fig S4.** Reduced magnetization plot at the indicated temperature for complex **1**.

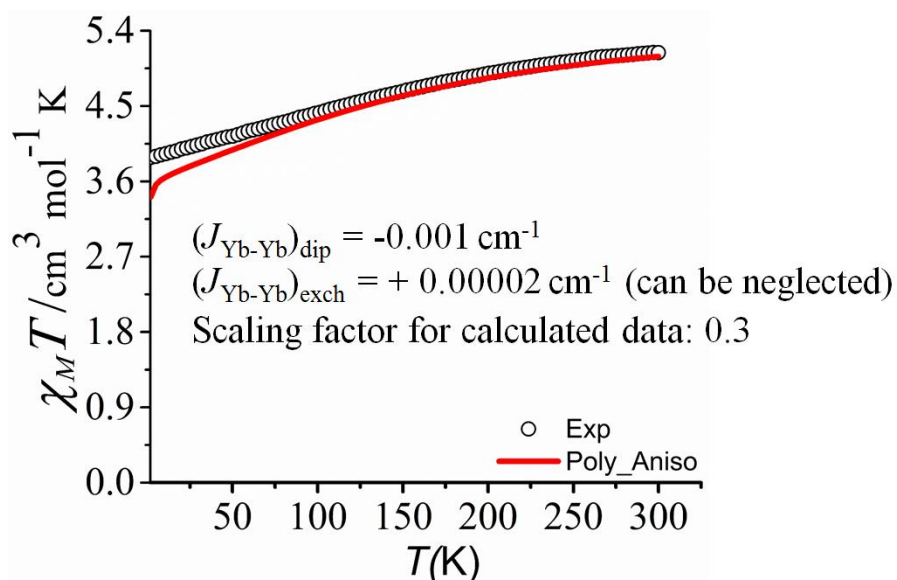

**Fig S5.** The fits of experimental magnetic susceptibility of **1** utilizing POLY\_ANISO module.

### BS-DFT Calculations

To gain insight into the magnetic exchange coupling between the Yb centres, the BS-DFT calculations were performed by replacing Yb<sup>+3</sup> with isotropic Gd<sup>+3</sup> ions within the ORCA 4.0 software package.<sup>1</sup> The relativistic effects were included with the zero order regular approximation (ZORA), together with the scalar relativistic contracted version of the basis functions def2-TZVPP for Gd, and def2-TZVP(-f) for N, O, C and H atoms. In these calculations the well-known B3LYP functional was employed to extract the isotropic exchange coupling using the method of Yamaguchi where the exchange coupling is determined from the energies (E) and expectation values ( $\langle S^2 \rangle$ ) of the triplet and broken symmetry singlet states. Later the obtained isotropic exchange coupling constant  $J$  has been rescaled to the pseudo spin  $\frac{1}{2}$  of the corresponding lanthanide atoms.

$$J = \frac{-(E_T - E_{BSS})}{\langle S^2 \rangle_T - \langle S^2 \rangle_{BSS}}$$

| Energy of the high spin and broken symmetry state for <b>1</b> |                  |                       | Exchange coupling constant (cm <sup>-1</sup> ) |
|----------------------------------------------------------------|------------------|-----------------------|------------------------------------------------|
| Spin State                                                     | Energy (Hartree) | $\langle S^2 \rangle$ | -0.007 (Yb-Yb)                                 |
| HS                                                             | -25814.654911    | 56.0121               |                                                |
| BS                                                             | -25814.654922    | 7.0121                |                                                |

### Simulation of Molar Magnetic Susceptibility and Magnetization

To simulate the direct current magnetic susceptibility and magnetization data, we have performed simulation in PHI using lines' model. The SHAPE analysis shows that the ytterbium

center possess  $C_{2v}$  point group in the studied complex. Therefore, we have used following Hamiltonian to simulate the direct current magnetic susceptibility and magnetization data.

$$\hat{H}_{CF} = -2J_{Yb-Yb} (S_{Yb1} \cdot S_{Yb2}) + B_0^2 C_0^2 + B_2^2 C_2^2 + B_0^4 C_0^4 + B_2^4 C_2^4 + B_4^4 C_4^4 + B_0^6 C_0^6 + B_2^6 C_2^6 + B_4^6 C_4^6 + B_6^6 C_6^6$$

Where  $B_q^k$  is the crystal field parameter,  $J$  ( $J_{\text{exch}} + J_{\text{dip}}$ ) is the exchange coupling constant between ytterbium center,  $C_q^k$  is the crystal field matrix. In this regard, we have used the crystal field parameters obtained from the ab initio calculation, and exchange coupling constant  $J$  obtained from BS-DFT calculations during the simulation. It was found that the parameters obtained from theoretical calculations (CFPs and  $J$ ) replicate both the magnetic susceptibility as well as magnetization data for the studied complexes. However, a little discrepancy between the simulated and experimental data are commonly observed as reported in the literature.<sup>9</sup> Further, the simulation of the excited states reveals that first four exchange coupled states are almost degenerate and the significant energy difference is observed at 314  $\text{cm}^{-1}$  which is very close to the energy difference between ground and excited states (306  $\text{cm}^{-1}$ ) obtained from Single\_Aniso calculations (vide infra).

**Table S5.** The energy of the exchange coupled states and Single\_Aniso computed KDs for the studied complex.

| Energy of the Exchange coupled states | Energy of the KDs obtained from Single_Aniso calculation |
|---------------------------------------|----------------------------------------------------------|
| 0.000                                 | 0.000                                                    |
| 314.79                                | 306.350                                                  |
| 518.81                                | 522.631                                                  |
| 629.59                                | 663.14                                                   |

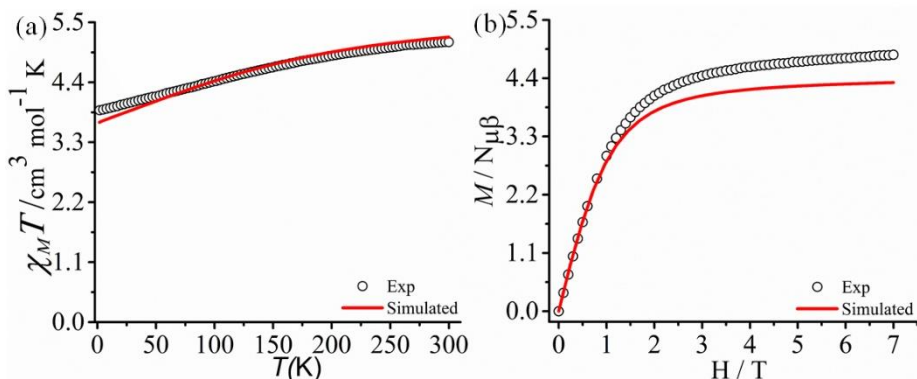

**Fig S6.** Experimental and simulated magnetic data using lines model obtained from BS-DFT calculated exchange coupling constant and ab initio calculations.

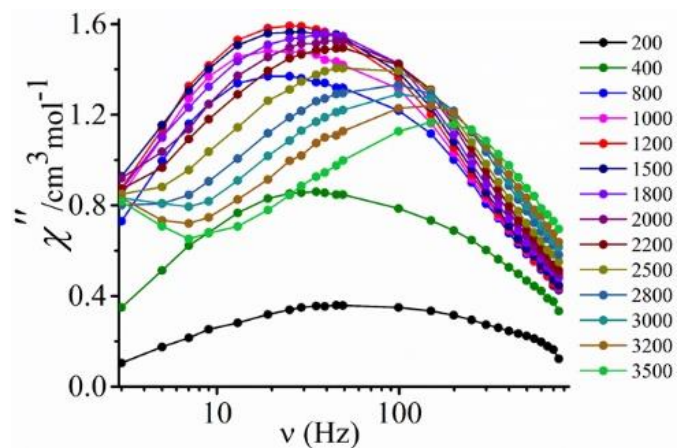

**Fig S7.** The out-of-phase ( $\chi''$ ) susceptibility under different external magnetic fields (Oe) at 2 K and the highest peak maxima observed under 1200 Oe field (Optimum field). The additional peaks at higher magnetic fields (above 2200 Oe) may be due to the presence of direct process.

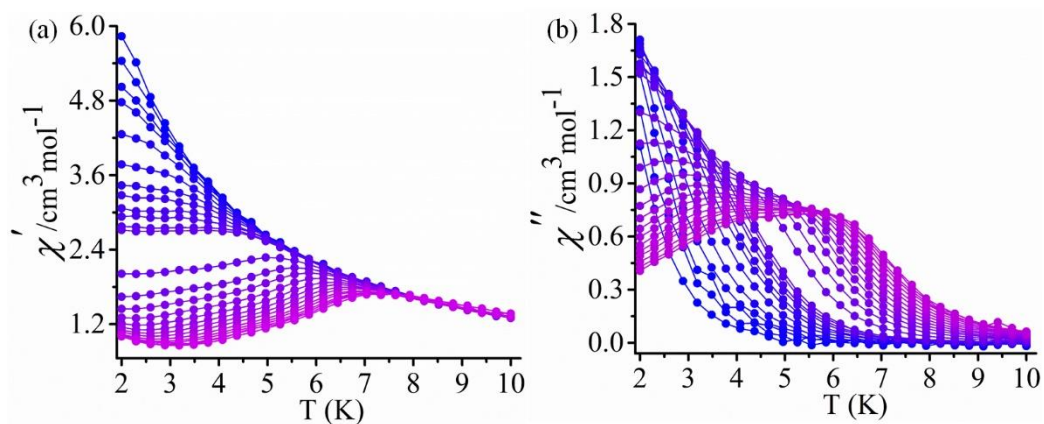

**Fig S8.** Temperature dependence of in-phase ( $\chi'$ ) (a) and out-of-phase ( $\chi''$ ) (b) susceptibility collected under 0.12 T external dc field in the range of frequency 1-750 Hz.

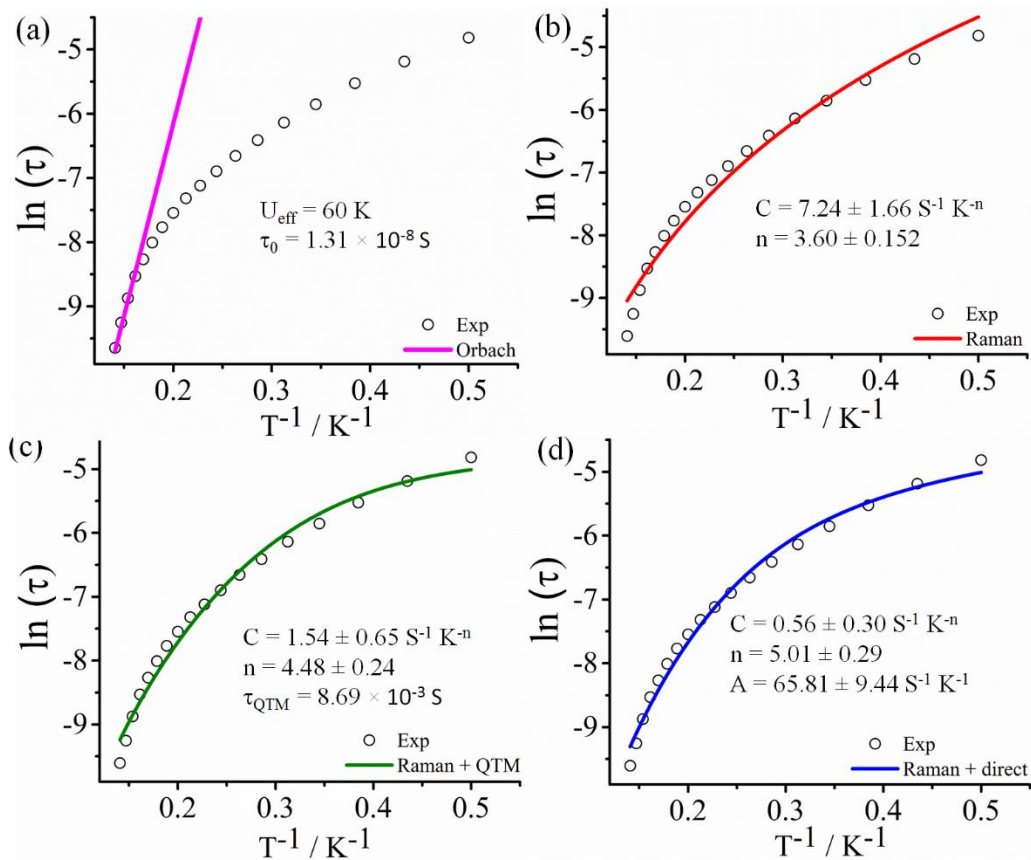

**Fig S9.** The fitting of temperature dependence of relaxation time with different combinations of relaxation process.

**Table S6.** The parameters obtained from the fitting of frequency dependent data using generalized Debye model for complex **1**.

| T (K) | $\chi_S$ | $\chi_T$ | $\tau$ (s)                                      | $\alpha$ |
|-------|----------|----------|-------------------------------------------------|----------|
| 2     | 0.60882  | 6.93762  | $0.00809 (\pm 1.96 \times 10^{-4})$             | 0.3629   |
| 2.3   | 0.53493  | 6.06814  | $0.00558 (\pm 1.10 \times 10^{-4})$             | 0.34426  |
| 2.6   | 0.47826  | 5.36561  | $0.00399 (\pm 6.64 \times 10^{-5})$             | 0.32838  |
| 2.9   | 0.44837  | 4.77449  | $0.00287 (\pm 5.64 \times 10^{-5})$             | 0.30977  |
| 3.2   | 0.43268  | 4.33001  | $0.00216 (\pm 4.91 \times 10^{-5})$             | 0.29582  |
| 3.5   | 0.41108  | 3.9459   | $0.00164 (\pm 4.23 \times 10^{-5})$             | 0.28639  |
| 3.8   | 0.42514  | 3.631    | $0.00128 (\pm 3.55 \times 10^{-5})$             | 0.27077  |
| 4.1   | 0.43767  | 3.34746  | $0.00101 (\pm 2.88 \times 10^{-5})$             | 0.25595  |
| 4.4   | 0.4857   | 3.09339  | $8.09 \times 10^{-4} (\pm 2.41 \times 10^{-5})$ | 0.22821  |
| 4.7   | 0.53844  | 2.88616  | $6.63 \times 10^{-4} (\pm 2.09 \times 10^{-5})$ | 0.19835  |
| 5     | 0.56937  | 2.68423  | $5.28 \times 10^{-4} (\pm 1.67 \times 10^{-5})$ | 0.16307  |
| 5.3   | 0.58658  | 2.52312  | $4.23 \times 10^{-4} (\pm 1.30 \times 10^{-5})$ | 0.13441  |
| 5.6   | 0.59022  | 2.38362  | $3.32 \times 10^{-4} (\pm 1.01 \times 10^{-5})$ | 0.10899  |
| 5.9   | 0.57243  | 2.25313  | $2.56 \times 10^{-4} (\pm 8.11 \times 10^{-6})$ | 0.08376  |

|     |         |         |                                                 |         |
|-----|---------|---------|-------------------------------------------------|---------|
| 6.2 | 0.50806 | 2.13255 | $1.97 \times 10^{-4} (\pm 8.01 \times 10^{-6})$ | 0.06881 |
| 6.5 | 0.42727 | 2.04864 | $1.39 \times 10^{-4} (\pm 6.01 \times 10^{-6})$ | 0.07071 |
| 6.8 | 0.36642 | 1.95161 | $9.57 \times 10^{-5} (\pm 5.64 \times 10^{-6})$ | 0.07423 |
| 7.1 | 0       | 1.86829 | $6.27 \times 10^{-5} (\pm 7.59 \times 10^{-7})$ | 0.06255 |

**Table S7.** Comparison of  $U_{\text{eff}}$  value of this work with the other reported Yb-based SMMs.

| SL. No. | Complex                                                                                                                                                                                                                                                                                                                     | $H_{\text{dc}}(\text{Oe})$ | $U_{\text{eff}}(\text{K})$ | $\tau_0(\text{s})$    | Ref.      |
|---------|-----------------------------------------------------------------------------------------------------------------------------------------------------------------------------------------------------------------------------------------------------------------------------------------------------------------------------|----------------------------|----------------------------|-----------------------|-----------|
| 1       | $[\text{Yb}(\text{Ph}_3\text{PO})_4(\text{OTf})_2][\text{OTf}] \cdot (\text{C}_2\text{H}_5\text{OH})_{0.5}$                                                                                                                                                                                                                 | 2000                       | 28 (Orbach)                | $2.88 \times 10^{-8}$ | 9b        |
| 2       | $[\text{Yb}_2(\text{valdien})_2(\text{NO}_3)_2]$<br>$\text{H}_2\text{valdien} = \text{N}1, \text{N}3\text{-bis}(3\text{-methoxysalicylidene})\text{diethylenetriamine}$                                                                                                                                                     | 1000                       | 66 (Orbach + Raman + QTM)  | $4.62 \times 10^{-8}$ | 9c        |
| 3       | $[\text{YbL}(\text{NO}_3)_3(\text{MeOH})] \cdot \text{MeCN}$<br>$\text{L} = (2\text{-}(1\text{-methyl-}2\text{-}((1\text{-methyl-}1\text{H-imidazol-}2\text{-yl)methylene)hydrazinyl)pyridine)$                                                                                                                             | 1000                       | 17.8 (Orbach)              | $8.7 \times 10^{-7}$  | 10a       |
| 4       | $[\text{YbZn}_4(\text{quinha})_4(\text{iqn})_4(\text{DMF})_4]$<br>$(\text{CF}_3\text{SO}_3)_3 \cdot 6\text{DMF} \cdot 4\text{H}_2\text{O}$ [ $\text{Hquinha} = \text{quinaldichydroxamic acid}$ , $\text{iqn} = \text{isoquinoline}$ ]                                                                                      | 600                        | 22.76 (Orbach)             | $3.90 \times 10^{-7}$ | 10b       |
| 5       | $[\text{Yb}(\text{H}_3\text{Bmshp})(\text{DMF})_2\text{Cl}_2] \cdot \text{DMF} \cdot 1.5\text{H}_2\text{O}$<br>$[\text{Yb}(\text{H}_3\text{Bmshp})(\text{DMF})_2\text{Cl}_2] \cdot \text{H}_4\text{Bmshp}$<br>$\text{H}_4\text{Bmshp} = (2,6\text{-bis}[(3\text{-ethoxysalicylidene) hydrazinecarbonyl}] \text{-pyridine})$ | 1500                       | 14.5 (Orbach)              | $2.38 \times 10^{-5}$ | 10c       |
|         |                                                                                                                                                                                                                                                                                                                             | 600                        | 38.3 (Orbach)              | $7.16 \times 10^{-7}$ |           |
| 6       | $\text{Yb}(\text{trensal})$ , $\text{H}_3\text{trensal} = 2,2',2''\text{-tris}(\text{salicylideneimino})\text{triethylamine}$                                                                                                                                                                                               | 2000                       | 53.2 (Orbach)              | $1.51 \times 10^{-8}$ | 10d       |
| 7       | $[\text{Yb}(\text{H}_2\text{O})_5(\text{NCS})_3] \cdot \text{H}_2\text{O}$                                                                                                                                                                                                                                                  | 2500                       | 50 (Orbach)                | $2.3 \times 10^{-8}$  | 10e       |
| 8       | $[\text{Yb}_2(5\text{-Me-L})_2(\text{DMF})_2(\text{NO}_3)_2] \cdot \text{DMF}$<br>$\text{L} = 5\text{-Me-LH}_2 = \text{N}'\text{-(}2\text{-hydroxy-}5\text{-methylbenzylidene)picolinohydrazide}$                                                                                                                           | 1200                       | 60 (Orbach)                | $1.33 \times 10^{-8}$ | This work |
|         |                                                                                                                                                                                                                                                                                                                             |                            | 77.1 (Orbach + Raman)      | $1.70 \times 10^{-9}$ |           |

**Table S8.** SINGLE\_ANISO computed crystal-field parameters for complex 1.

| k | Q                               | Complex 1   |
|---|---------------------------------|-------------|
|   | -2                              | -0.1374E+01 |
|   | -1                              | -0.2748E+01 |
| 2 | 0                               | -0.1211E+02 |
|   | 1                               | 0.3086E+01  |
|   | 2                               | 0.1901E+02  |
|   | $ B_2^2/B_2^0 $ [only $B_2^2$ ] | 1.56        |

|   |                                              |             |
|---|----------------------------------------------|-------------|
|   | is considered as it has larger contribution] |             |
|   | -4                                           | 0.9570E-01  |
|   | -3                                           | 0.2706E+00  |
|   | -2                                           | 0.7234E-01  |
|   | -1                                           | 0.1023E+00  |
| 4 | 0                                            | -0.1503E+00 |
|   | 1                                            | -0.8369E-01 |
|   | 2                                            | 0.3305E+00  |
|   | 3                                            | 0.3752E-01  |
|   | 4                                            | -0.2868E+00 |
|   |                                              |             |
|   | -6                                           | 0.3474E-01  |
|   | -5                                           | 0.1203E+00  |
|   | -4                                           | 0.2565E-01  |
|   | -3                                           | 0.4684E-01  |
|   | -2                                           | 0.2342E-01  |
|   | -1                                           | 0.2962E-01  |
| 6 | 0                                            | -0.2025E-02 |
|   | 1                                            | 0.6881E-02  |
|   | 2                                            | -0.1005E-02 |
|   | 3                                            | 0.7402E-02  |
|   | 4                                            | -0.3483E-02 |
|   | 5                                            | 0.1014E-01  |
|   | 6                                            | 0.4246E-01  |

**Table S9.** Ab initio calculated low-lying spin-free and spin-orbit energy states for the investigated complex.

| Spin-free energy states | Spin-orbit energy states |
|-------------------------|--------------------------|
| 0.000                   | 0.000                    |
| 274.907                 | 306.350                  |
| 411.917                 | 306.350                  |
| 574.470                 | 522.631                  |
| 702.038                 | 522.631                  |
| 745.839                 | 663.148                  |
| 860.084                 | 663.148                  |

**Table S10.** Single\_Aniso computed energy of the KDs, g and wavefunctions composition for Complex 1.

| Kramers doublets (KDs) | Energy (cm <sup>-1</sup> ) | g <sub>x</sub> | g <sub>y</sub> | g <sub>z</sub> | angle (°) | Wave function composition                          |
|------------------------|----------------------------|----------------|----------------|----------------|-----------|----------------------------------------------------|
| 1                      | 0.000                      | 0.821          | 1.762          | 7.01           |           | 86.67% ±7/2>+8.37% ±3/2>+2.55% ±5/2>+2.39% ±1/2>   |
| 2                      | 306.35                     | 1.326          | 2.520          | 4.707          | 78.18     | 42.82% ±1/2>+36.74% ±5/2>+11.49% ±3/2>+8.39% ±7/2> |
| 3                      | 522.63                     | 0.033          | 2.319          | 5.219          | 81.55     | 56.45% ±3/2>+34.52% ±5/2>+5.96% ±1/2>+3.04% ±7/2>  |
| 4                      | 663.14                     | 0.782          | 1.183          | 7.409          | 98.24     | 48.80% ±1/2>+26.17% ±5/2>+23.67% ±3/2>+1.34% ±7/2> |

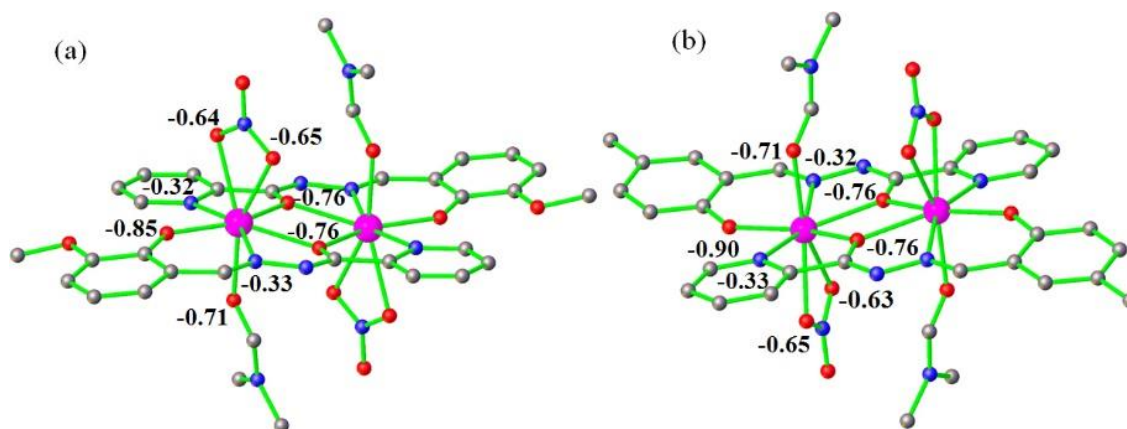

**Fig S10.** LoProp charges of the selected atoms for the reported dinuclear ytterbium analogue (a) and studied complex (b).

**Table S11.** Energy of the four KDs and corresponding g tensor for model complex **1a**.

| Energy (cm <sup>-1</sup> ) | g <sub>x</sub> | g <sub>y</sub> | g <sub>z</sub> |
|----------------------------|----------------|----------------|----------------|
| 0.0                        | 0.642          | 1.195          | 7.35           |
| 427.5                      | 1.429          | 2.231          | 5.47           |
| 784.0                      | 1.190          | 1.818          | 5.28           |
| 1139.2                     | 0.386          | 0.436          | 7.83           |

**Table S12.** Energy of the four KDs and corresponding g tensor for model complex **1b**.

| Energy (cm <sup>-1</sup> ) | g <sub>x</sub> | g <sub>y</sub> | g <sub>z</sub> |
|----------------------------|----------------|----------------|----------------|
| 0.0                        | 0.31           | 0.38           | 7.87           |
| 1132.5                     | 0.78           | 1.47           | 5.23           |
| 1694.5                     | 2.33           | 2.53           | 3.95           |
| 2217.5                     | 0.38           | 0.725          | 7.52           |



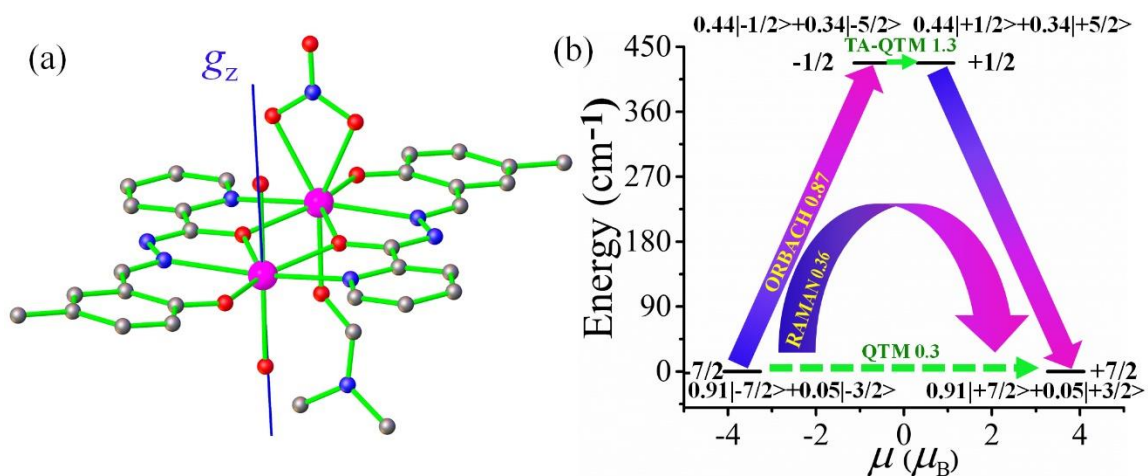

**Fig S11.** The orientation of the anisotropic axis for the ground state (a) and calculated blockade barrier for model complex **1a**. The values provided at each arrow represent the corresponding matrix element of the transition magnetic moment.

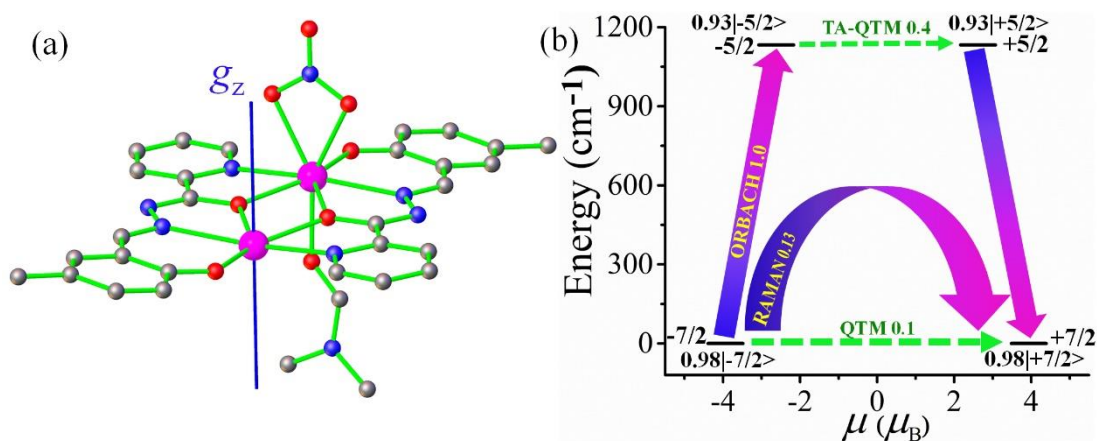

**Fig S12.** The orientation of the anisotropic axis for the ground state (a) and calculated blockade barrier for model complex **1b**. The values provided at each arrow represent the corresponding matrix element of the transition magnetic moment.

#### Reference:

1. Kahn, O. *Molecular Magnetism*, VCH Publishers Inc. **1991**.
2. G. Sheldrick, *Acta Crystallogr C.*, 2015, **71**, 3.
3. O. V. Dolomanov, L. J. Bourhis, R. J. Gildea, J. A. K. Howard and H. Puschmann, *J. Appl. Crystallogr.*, 2009, **42**, 339-341.
4. F. Aquilante, J. Autschbach, R. K. Carlson, L. F. Chibotaru, M. G. Delcey, L. De Vico, I. Fdez. Galván, N. Ferré, L. M. Frutos, L. Gagliardi, M. Garavelli, A. Giussani, C. E.

- Hoyer, G. Li Manni, H. Lischka, D. Ma, P. Å. Malmqvist, T. Müller, A. Nenov, M. Olivucci, T. B. Pedersen, D. Peng, F. Plasser, B. Pritchard, M. Reiher, I. Rivalta, I. Schapiro, J. Segarra-Martí, M. Stenrup, D. G. Truhlar, L. Ungur, A. Valentini, S. Vancoillie, V. Veryazov, V. P. Vysotskiy, O. Weingart, F. Zapata and R. Lindh, *J. Comput. Chem.*, 2016, **37**, 506.
5. B. A. Heß, C. M. Marian, U. Wahlgren and O. Gropen, *Chem. Phys. Lett.*, 1996, **251**, 365-371.
  6. B. O. Roos and P.-Å. Malmqvist, *PCCP*, 2004, **6**, 2919-2927.
  7. P. Å. Malmqvist, B. O. Roos and B. Schimmelpfennig, *Chem. Phys. Lett.*, 2002, **357**, 230-240.
  8. L. F. Chibotaru and L. Ungur, *J. Chem. Phys.*, 2012, **137**, 064112.
  9. (a) M. J. Giansiracusa, S. Al-Badran, A. K. Kostopoulos, G. F. S. Whitehead, E. J. L. McInnes, D. Collison, R. E. P. Winpenny and N. F. Chilton, *Inorg. Chem. Front.*, 2020, **7**, 3909-3918. (b) A. Borah, S. Dey, S. K. Gupta, M. G. Walawalkar, G. Rajaraman and R. Murugavel, *Chem. Commun.*, 2020, **56**, 11879-11882. (c) G. Brunet, R. Marin, M.-J. Monk, U. Resch-Genger, D. A. Gállico, F. A. Sigoli, E. A. Suturina, E. Hemmer and M. Murugesu, *Chem. Sci.*, 2019, **10**, 6799-6808.
  10. (a) A. Gorczyński, D. Marcinkowski, M. Kubicki, M. Löffler, M. Korabik, M. Karbowski, P. Wiśniewski, C. Rudowicz and V. Patroniak, *Inorg. Chem. Front.*, 2018, **5**, 605-618. (b) Q.-W. Li, J.-L. Liu, J.-H. Jia, Y.-C. Chen, J. Liu, L.-F. Wang and M.-L. Tong, *Chem. Commun.*, 2015, **51**, 10291-10294. (c) D.-Q. Wu, D. Shao, X.-Q. Wei, F.-X. Shen, L. Shi, Y.-Q. Zhang and X.-Y. Wang, *Dalton Trans.*, 2017, **46**, 12884-12892. (d) K. S. Pedersen, J. Dreiser, H. Weihe, R. Sibille, H. V. Johannesen, M. A. Sørensen, B. E. Nielsen, M. Sigrist, H. Mutka, S. Rols, J. Bendix and S. Piligkos, *Inorg. Chem.*, 2015, **54**, 7600-7606. (e) S. P. Petrosyants, K. A. Babeshkin, A. V. Gavrikov, A. B. Ilyukhin, E. V. Belova and N. N. Efimov, *Dalton Trans.*, 2019, **48**, 12644-12655.
